# Supplementary material for: Circulating insulin-like growth factor-I, insulin-like growth factor binding protein-3 and terminal duct lobular unit involution of the breast: a cross-sectional study of women with benign breast disease
Source: Springer Nature journal article supplement (doi:10.1186/s13058-016-0678-4), 2016-02-18
Supplement: MOESM1 [file 9781650]

**Table S1.** Radiologic and pathologic characteristics of women in the BREAST Stamp Project with benign breast disease, stratified by menopausal status

| Characteristic                                                  | Premenopausal |                 | Postmenopausal |                 |
|-----------------------------------------------------------------|---------------|-----------------|----------------|-----------------|
|                                                                 | N = 155       |                 | N = 73         |                 |
|                                                                 | N             | %               | N              | %               |
| <b>Biopsy type<sup>a</sup></b>                                  |               |                 |                |                 |
| Ultrasound-guided                                               | 88            | 56.8            | 30             | 41.1            |
| Stereotactic-guided                                             | 67            | 43.2            | 43             | 58.9            |
| <b>Biopsy laterality</b>                                        |               |                 |                |                 |
| Left                                                            | 78            | 50.3            | 37             | 50.7            |
| Right                                                           | 77            | 49.7            | 36             | 49.3            |
| <b>Pathologic diagnosis</b>                                     |               |                 |                |                 |
| Benign                                                          | 66            | 42.6            | 29             | 39.7            |
| Proliferative                                                   | 79            | 51.0            | 33             | 45.2            |
| Proliferative with atypia                                       | 10            | 6.4             | 11             | 15.1            |
| <b>Percent fat on H&amp;E slide,<sup>b</sup> by biopsy type</b> |               |                 |                |                 |
| Ultrasound-guided                                               |               |                 |                |                 |
| ≤ 30                                                            | 40            | 47.6            | 17             | 56.7            |
| > 30 - 60                                                       | 18            | 21.4            | 7              | 23.3            |
| > 60 - 100                                                      | 26            | 31.0            | 6              | 20.0            |
| Stereotactic-guided                                             |               |                 |                |                 |
| ≤ 30                                                            | 25            | 37.3            | 18             | 42.9            |
| > 30 - 60                                                       | 15            | 22.4            | 12             | 28.6            |
| > 60 - 100                                                      | 27            | 40.3            | 12             | 28.6            |
|                                                                 | <b>Mean</b>   | <b>95% CI</b>   | <b>Mean</b>    | <b>95% CI</b>   |
| <b>Volumetric mammographic density measures<sup>c</sup>:</b>    |               |                 |                |                 |
| Percent fibroglandular volume (%)                               | 43.2          | 39.65 - 46.79   | 31.3           | 26.78 - 35.62   |
| Absolute fibroglandular volume (cm <sup>3</sup> )               | 204.4         | 187.78 - 221.99 | 186.6          | 161.67 - 204.47 |
| <b>Area mammographic density measures<sup>c</sup>:</b>          |               |                 |                |                 |
| Percent dense area (%)                                          | 31.5          | 28.29 - 34.57   | 20.9           | 16.70 - 25.38   |
| Absolute dense area (cm <sup>2</sup> )                          | 38.5          | 34.29 - 42.97   | 28.8           | 23.52 - 34.92   |

Abbreviations: H&E = hematoxylin and eosin

<sup>a</sup>There were also participants in the BREAST Stamp Project who received an either MRI-guided biopsy or surgical excision, these individuals were not included in our analytic sample.

<sup>b</sup>Percent fat present in the histological specimen selected for assessment of terminal duct lobular unit (TDLU) involution.

<sup>c</sup>Density measures are from the ipsilateral breast on which the biopsy was performed and TDLU measures assessed.
