# Supplementary material for: Circulating insulin-like growth factor-I, insulin-like growth factor binding protein-3 and terminal duct lobular unit involution of the breast: a cross-sectional study of women with benign breast disease
Source: Springer Nature journal article supplement (doi:10.1186/s13058-016-0678-4), 2016-02-18
Supplement: MOESM2 [file 9781650]

**Table S2:** Correlations between TDLU measures

| <b>All women</b>                |                                                           |                                                              |
|---------------------------------|-----------------------------------------------------------|--------------------------------------------------------------|
| <b>TDLU Measure</b>             | <b>Median category of acini counts per TDLU, <i>r</i></b> | <b>Median TDLU span (<math>\mu\text{m}</math>), <i>r</i></b> |
| TDLU count <sup>1</sup>         | 0.09                                                      | 0.0005                                                       |
| Median TDLU span, $\mu\text{m}$ | 0.62*                                                     | ~                                                            |
| <b>Postmenopausal Women</b>     |                                                           |                                                              |
| <b>TDLU Measure</b>             | <b>Median category of acini counts per TDLU, <i>r</i></b> | <b>Median TDLU span (<math>\mu\text{m}</math>), <i>r</i></b> |
| TDLU count <sup>1</sup>         | 0.10                                                      | 0.03                                                         |
| Median TDLU span, $\mu\text{m}$ | 0.68*                                                     | ~                                                            |
| <b>Premenopausal women</b>      |                                                           |                                                              |
| <b>TDLU Measure</b>             | <b>Median category of acini counts per TDLU, <i>r</i></b> | <b>Median TDLU span (<math>\mu\text{m}</math>), <i>r</i></b> |
| TDLU count <sup>1</sup>         | 0.05                                                      | -0.18                                                        |
| Median TDLU span, $\mu\text{m}$ | 0.55*                                                     | ~                                                            |

Abbreviations: TDLU = terminal duct lobular unit, *r* = Spearman rho  
Correlations between TDLU measures were assessed by Spearman rank correlation,  
\**P* < 0.001.

<sup>1</sup>TDLU count refers to numbers of TDLUs per unit of tissue area.
